# Supplementary material for: Clinical Outcomes of Magnetic Seizure Therapy vs Electroconvulsive Therapy for Major Depressive Episode: A Randomized Clinical Trial
Source: PubMed Central journal article supplement (PMC10701670; doi:10.1001/jamapsychiatry.2023.4599), 2023-12-06
Supplement: jamapsychiatry-e234599-s002.pdf [file jamapsychiatry-e234599-s002.pdf]

## Supplemental Online Content

Deng ZD, Luber B, McClintock SM, Weiner RD, Husain MM, Lisanby SH. Clinical outcomes of magnetic seizure therapy vs electroconvulsive therapy for major depressive episode: a randomized clinical trial. *JAMA Psychiatry*. Published online December 6, 2023. doi:10.1001/jamapsychiatry.2023.4599

**eFigure 1.** Inventory of Depressive Symptomatology (IDS)

**eFigure 2.** Seizure Duration and Time to Orientation

This supplemental material has been provided by the authors to give readers additional information about their work.

**eFigure 1.** Inventory of Depressive Symptomatology (IDS)

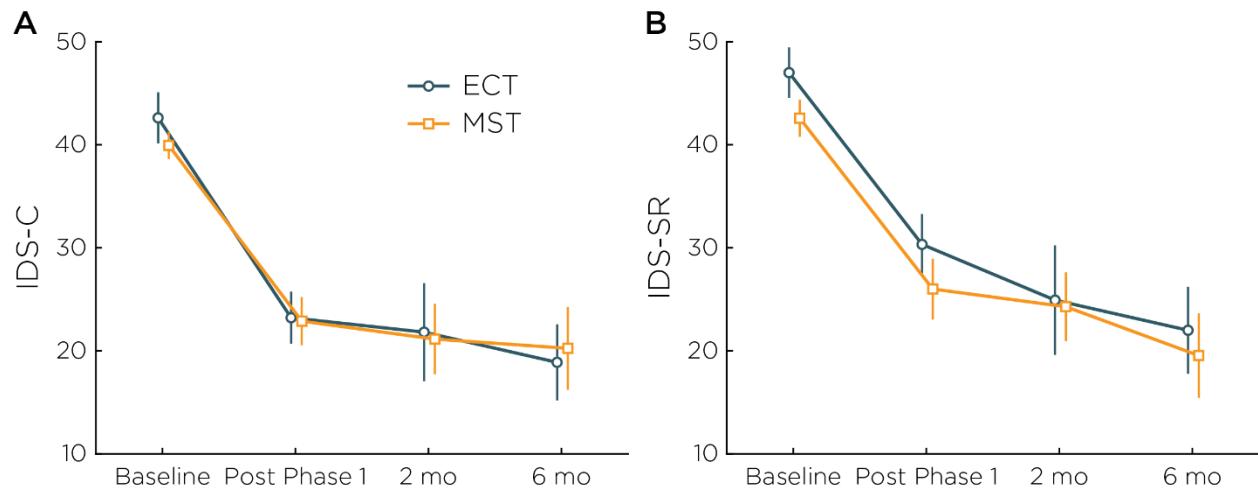

A, Clinician-rated (IDS-C). B, self-report (IDS-SR). The  $2 \times 2$  mixed-model ANOVA (between-group factor: MST vs ECT; repeated-measures factor: baseline vs end of acute treatment course) using the IDS-C scores showed a significant main effect of time ( $F = 98.0, P < .001$ ) but no significant effect of group ( $F = 0.1, P = .77$ ) or group-by-session interaction ( $F = 0.1, P = .81$ ). IDS-SR scores showed a significant main effect of time ( $F = 54.8, P < .001$ ) but no effect of group ( $F = 1.6, P = .22$ ) or group-by-session interaction ( $F = 0.0, P > .99$ ).

**eFigure 2.** Seizure Duration and Time to Orientation

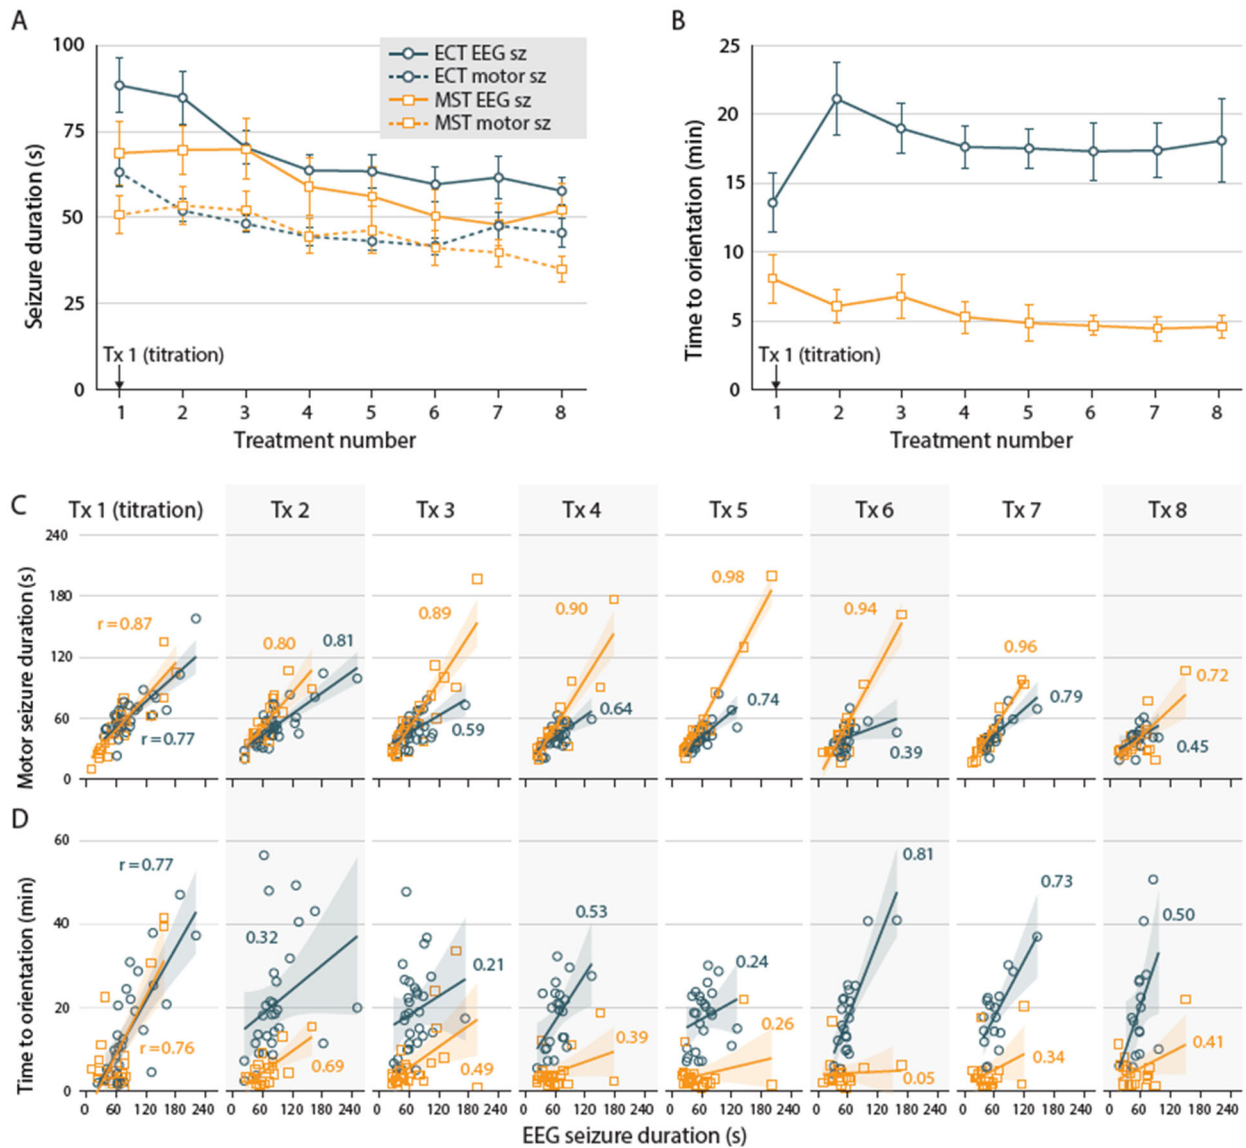

Data are presented for the first 8 treatments. A, Electroencephalographic (EEG) and motor seizure duration. The mixed-effects model showed that the mean motor seizure duration decreased as a function of treatment number (up to treatment 8;  $t = -6.38$ ,  $P < .001$ ) and did not differ between electroconvulsive therapy (ECT) and magnetic seizure therapy (MST) ( $t = -0.46$ ,  $P = .65$ ). The mean frontal EEG seizure duration also decreased as a function of treatment number ( $t = -6.72$ ,  $P < .001$ ) but did not differ between ECT and MST ( $t = -1.31$ ,  $P = .20$ ). B, Time to orientation. Participants regained orientation faster following MST than ECT at both threshold ( $F = 10.0$ ,  $P = .003$ ) and suprathreshold ( $F = 62.9$ ,  $P < .001$ ) levels. C, Session-by-session correlation between EEG seizure duration and motor seizure duration. The ratio of EEG to motor seizure duration for ECT was larger than that for MST ( $t = -3.23$ ,  $P = .002$ ) and did not change with treatment number ( $t = 0.027$ ,  $P = .98$ ), suggesting that the seizure spread beyond the motor cortex in the case of ECT but was more focal for MST. D, Session-by-session correlation between EEG seizure duration and time to orientation. Seizure duration was associated with time to orientation for both ECT and MST.
