# Supplementary material for: Clinical Outcomes of Magnetic Seizure Therapy vs Electroconvulsive Therapy for Major Depressive Episode: A Randomized Clinical Trial
Source: PubMed Central journal article supplement (PMC10701670; doi:10.1001/jamapsychiatry.2023.4599), 2023-12-06
Supplement: jamapsychiatry-e234599-s003.pdf [file jamapsychiatry-e234599-s003.pdf]

## Data Sharing Statement

Deng. Clinical Outcomes of Magnetic Seizure Therapy vs Electroconvulsive Therapy for Major Depressive Episode. *JAMA Psychiatry*. Published December 06, 2023.

doi:10.1001/jamapsychiatry.2023.4599

### Data

**Data available:** Yes

**Data types:** Deidentified participant data, Data dictionary

**How to access data:** The data that support the findings of this study are available on request.

**When available:** With publication

### Supporting Documents

**Document types:** Statistical/analytic code

**How to access documents:** The data that support the findings of this study are available on request.

**When available:** With publication

### Additional Information

**Who can access the data:** Researchers whose proposed use of the data has been approved.

**Types of analyses:** For any purpose

**Mechanisms of data availability:** with investigator support
